# Supplementary material for: Entropy and enthalpy contributions to the kinetics of proton coupled electron transfer to the Mn4O4(O2PPh2)6 cubane
Source: Royal Society of Chemistry journal article supplement (doi:10.1039/c3cp55200d), 2014-01-01
Supplement: c3cp55200d1.pdf [file c3cp55200d1.pdf]

Supporting information for

## Entropy and Enthalpy Contributions to the Kinetics of Proton Coupled Electron Transfer to the $\text{Mn}_4\text{O}_4(\text{O}_2\text{PPh}_2)_6$ Cubane

Thomas G. Carrell, Paul F. Smith, Joseph Dennes, and G. Charles Dismukes\*

Department of Chemistry and Chemical Biology, Rutgers University, Piscataway NJ 08854

Department of Chemistry, Princeton University, Princeton NJ 08540

### Experimental

**Materials.**  $\text{Mn}_4\text{O}_4(\text{O}_2\text{PPh}_2)_6$  (**1**) was prepared as described elsewhere<sup>1</sup>. All other materials were of analytical purity from commercial sources and were used as received. Monodeuterated phenols were prepared by exchange using  $\text{CD}_3\text{OD}$  in approximately 500-fold excess in  $\text{CH}_2\text{Cl}_2$  solution<sup>2</sup>.

**Kinetic Measurements.** The reactions of phenols with **1** were monitored by UV-Vis spectrophotometry on an HP-8452A spectrophotometer in  $\text{CH}_2\text{Cl}_2$  solution. Constant temperature was maintained using a Neslab Endocal RTE-5DD circulating water bath. All measurements were made at  $25.0 \pm 0.1^\circ\text{C}$  unless otherwise stated. The change in the absorbance at 342 nm was monitored. This wavelength reflects the change in concentration of **1** and is located in the center of a region of the spectrum that bleaches upon reaction of phenols with **1**.

**Data analysis.** All data points represent an average of five separate experimental trials. Initial rates were calculated directly from the initial slopes of the absorbance vs. time traces, yielding  $(-dA/dt)$ . The pseudo-first order rate constant  $k_{\text{obs}}$  was determined by fitting the slope from a plot of  $\ln(A_t - A_\infty)$  vs. time:

$$\ln(A_t - A_\infty) = -k_{\text{obs}} * t + \text{constant}$$

The second order rate constant is obtained by fitting the corresponding equation:

$$K_{\text{obs}} = k_2 [\text{phenol}]$$

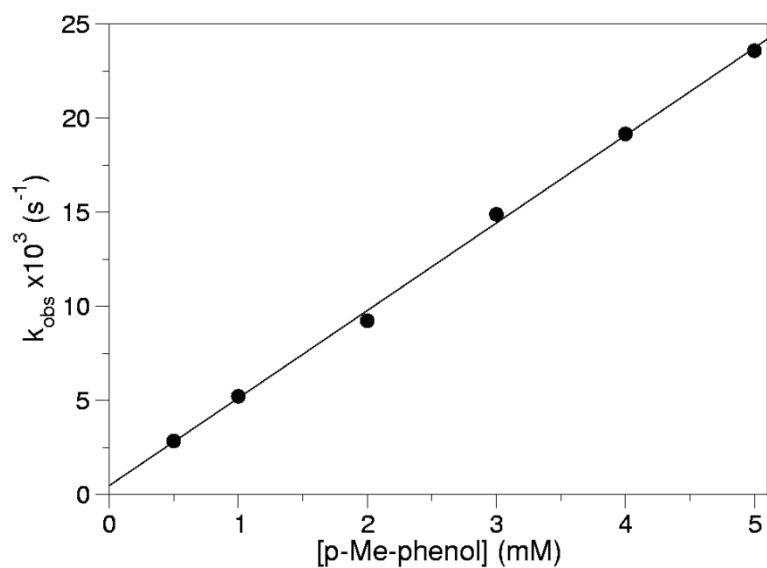

Figure S1: Pseudo-first order rate constant  $k_{\text{obs}}$  as a function of the concentration of *p*-Me-phenol for the reaction between **1** and *p*-Me-phenol at 25.0°C. Conditions:  $[\mathbf{1}] = 0.10 \text{ mM}$  in  $\text{CH}_2\text{Cl}_2$ ;  $[\text{p-Me-phenol}] = 0.50\text{-}5.0 \text{ mM}$ .

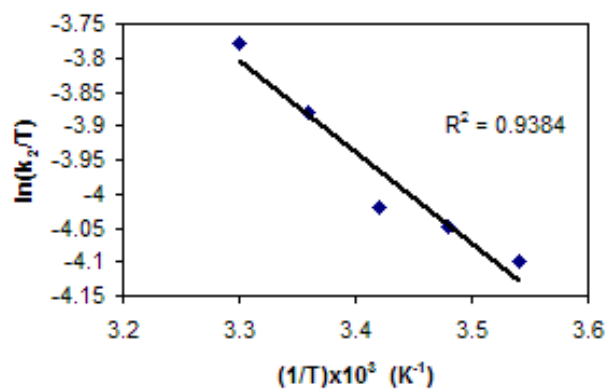

Figure S2: Temperature dependence of the reaction between **1** and *p*-Me-phenol. Conditions:  $[\mathbf{1}] = 0.10 \text{ mM}$  in  $\text{CH}_2\text{Cl}_2$ ;  $[\text{p-Me-phenol}] = 3.0 \text{ mM}$ .

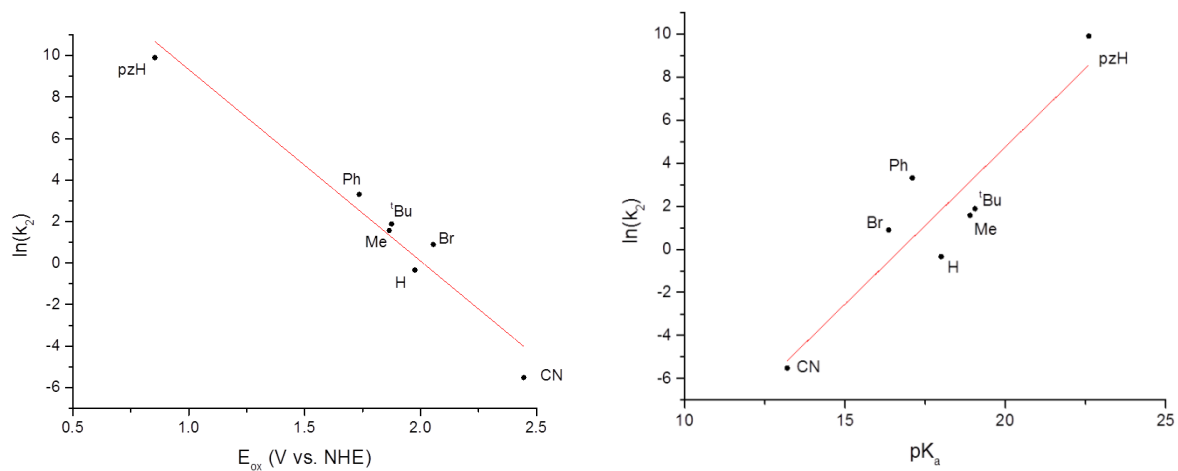

Figure S3: Dependence of the  $\ln(k_2)$  on the oxidation potential of the phenol and  $pK_a$  of the phenolic proton. Conditions:  $[1] = 0.10$  mM in  $CH_2Cl_2$ ;  $[p\text{-X-phenol}] = 3.0$  mM.

**Table S1.** Comparison of  $\mu$ -O-H BDE's for Mn complexes

| <i>Species</i>                                                                   | <i>Mn ox. state</i>       | <i>O-H BDE</i> | <i>Ref.</i> |
|----------------------------------------------------------------------------------|---------------------------|----------------|-------------|
| <b>1H</b>                                                                        | Mn <sub>4</sub> (3III,IV) | 84-99          | This work   |
| (Mn <sub>2</sub> (L-X) <sub>2</sub> ( $\mu$ -O)( $\mu$ -OH)) <sup>+a</sup>       | Mn <sub>2</sub> (III,IV)  | 76-79          | 3           |
| (Mn <sub>2</sub> ( $\mu$ -O)( $\mu$ -OH)(bpy) <sub>4</sub> ) <sup>3+b</sup>      | Mn <sub>2</sub> (2III)    | 84             | 3,4         |
| (Mn <sub>2</sub> ( $\mu$ -O)( $\mu$ -OH)(phen) <sub>4</sub> ) <sup>3+c</sup>     | Mn <sub>2</sub> (2III)    | 79             | 5           |
| (Mn <sub>2</sub> ( $\mu$ -O)( $\mu$ -OH)(bispicen) <sub>2</sub> ) <sup>3+d</sup> | Mn <sub>2</sub> (2III)    | 76             | 6           |

a. L-X = 2-hydroxy-1,3-bis(3,5-X<sub>2</sub>-salicylideneamino)propane (X= Cl, H or tBu)

b. Bpy= 2,2' bipyridine

c. Phen= 1,10-phenanthroline

d. Bispicen= N,N'-bis[2-methyl(pyridyl)ethane-1,2-diamine]

#### References

1. Carrell, T.G.; Cohen, S.; Dismukes, G.C. *J. Molec. Catal. A: Chemical.* **2002**, 187, 3-15.
2. Biczók, L.; Gupta, N.; Linschitz, H. *J. Am. Chem. Soc.* **1997**, 119, 12601-12609.
3. Baldwin, M.J.; Pecoraro, V.L. *J. Am. Chem. Soc.* **1996**, 118, 11325-11326.
4. Thorp, H.H.; Sarneski, J.E.; Brudvig, G.W.; Crabtree, R.H. *J. Am. Chem. Soc.* **1989**, 111, 9249-9250.
5. Wang, K.; Mayer, J.M. *J. Am. Chem. Soc.* **1997**, 119, 1470-1471.
6. Singhal, G.S. et. al. "Concepts in photobiology: Photosynthesis and Photomorphogenesis". 1999, Narosa Publishing House, New Delhi India.
